# Supplementary material
Source: PubMed Central journal article supplement (PMC3730266)
Supplement: NIHMS472280-supplement-Supplemental_Table_2.pdf [file NIHMS472280-supplement-Supplemental_Table_2.pdf]

Supplemental Table 2. Differentially expressed genes encoding secreted proteins during *in vitro* follicle development

| Symbol    | Entrez ID | Method     | Timecourse Hotelling | Limma p-value | Group | Fold Change |          |          |          |          |
|-----------|-----------|------------|----------------------|---------------|-------|-------------|----------|----------|----------|----------|
|           |           |            |                      |               |       | D2 vs D0    | D4 vs D2 | D5 vs D4 | D6 vs D5 | D8 vs D6 |
| Zp3       | 22788     | Timecourse | 407                  | 4.36E-06      | 3     | -2.67       | -1.90    | -1.34    | -1.24    | -1.03    |
| Comp      | 12845     | Both       | 2637                 | 5.07E-06      | 10    | 1.07        | 3.19     | 3.20     | 1.92     | 1.58     |
| Bmp15     | 12155     | Both       | 586                  | 6.80E-06      | 3     | -1.91       | -2.09    | -1.67    | -1.08    | -1.12    |
| Igf2      | 16002     | Both       | 1266                 | 1.60E-05      | 10    | -1.34       | 3.22     | 2.04     | -1.23    | 1.78     |
| Serpinf1  | 20317     | Both       | 826                  | 4.21E-05      | 2     | 1.00        | -1.49    | -1.37    | -1.60    | 1.00     |
| Grem1     | 23892     | Both       | 2666                 | 5.23E-05      | 10    | 2.04        | 4.37     | 1.73     | 1.64     | 1.11     |
| Ctgf      | 14219     | Both       | 815                  | 5.41E-05      | 8     | -5.38       | 2.62     | 1.75     | -1.03    | 1.01     |
| Cxcl13    | 55985     | Both       | 894                  | 7.89E-05      | 10    | 1.39        | 1.51     | 1.28     | 2.65     | -1.05    |
| Gdf9      | 14566     | Both       | 797                  | 1.49E-04      | 3     | -1.67       | -2.24    | -1.34    | -1.31    | -1.09    |
| Pcsk9     | 100102    | Both       | 349                  | 1.50E-04      | 10    | 2.01        | 2.43     | 1.57     | 1.01     | -1.10    |
| Zp1       | 22786     | Timecourse | 246                  | 1.50E-04      | 3     | -2.26       | -1.66    | -1.36    | -1.15    | -1.26    |
| Adamts19  | 240322    | Both       | 544                  | 1.50E-04      | 1     | 1.30        | -1.85    | -1.88    | -1.18    | -1.04    |
| C2        | 12263     | Timecourse | 279                  | 2.40E-04      | 10    | 1.23        | 1.01     | 1.36     | 1.21     | 1.09     |
| Cpa1      | 109697    | Limma      | 0                    | 2.61E-04      | 3     | -2.20       | -1.58    | -1.46    | 1.00     | 1.00     |
| Prelp     | 116847    | Limma      | 0                    | 2.66E-04      | 3     | -1.29       | -2.24    | 1.00     | 1.00     | 1.00     |
| Umodl1    | 52020     | Limma      | 0                    | 3.19E-04      | 3     | -1.82       | -2.02    | 1.00     | 1.00     | 1.00     |
| Stc2      | 20856     | Limma      | 0                    | 3.32E-04      | 10    | -1.18       | 1.39     | 1.49     | 1.00     | 1.00     |
| Thbs2     | 21826     | Limma      | 0                    | 4.30E-04      | 1     | 2.15        | -2.23    | 1.00     | 1.00     | 1.00     |
| Tulp2     | 56734     | Both       | 207                  | 5.65E-04      | 10    | 1.57        | 1.47     | 1.75     | 1.06     | -1.04    |
| Fetub     | 59083     | Both       | 448                  | 6.08E-04      | 10    | 1.27        | 1.81     | 1.87     | -1.35    | -1.06    |
| Serping1  | 12258     | Limma      | 0                    | 6.65E-04      | 1     | 1.56        | -2.06    | 1.00     | 1.00     | 1.00     |
| Serpina3g | 20715     | Both       | 296                  | 6.69E-04      | 1     | 2.20        | -2.59    | -1.26    | 1.22     | -1.04    |
| Adam23    | 23792     | Limma      | 0                    | 8.66E-04      | 9     | 3.68        | 1.56     | 1.63     | 1.00     | 1.00     |
| Dkk3      | 50781     | Both       | 648                  | 9.71E-04      | 2     | 1.04        | -1.78    | -1.04    | -1.48    | -1.33    |
| Serpina3c | 16625     | Limma      | 0                    | 1.02E-03      | 9     | 1.49        | 1.60     | 1.00     | 1.40     | 1.00     |
| Col6a2    | 12834     | Limma      | 0                    | 1.02E-03      | 2     | -1.03       | 1.00     | -1.58    | 1.00     | 1.00     |
| Gdf10     | 14560     | Limma      | 0                    | 1.30E-03      | 1     | 1.23        | 1.00     | -1.92    | 1.00     | 1.00     |
| Lyz1      | 17110     | Both       | 1931                 | 1.34E-03      | 10    | -1.04       | 1.51     | 2.26     | 1.78     | 1.05     |
| Adamts5   | 23794     | Both       | 203                  | 1.52E-03      | 9     | 1.50        | 2.07     | 1.02     | 1.31     | 1.03     |
| Pros1     | 19128     | Timecourse | 282                  | 1.60E-03      | 7     | -1.03       | 1.26     | 1.10     | 1.21     | 1.19     |
| Tmem25    | 71687     | Both       | 375                  | 1.71E-03      | 10    | 2.08        | 1.11     | 1.25     | 1.50     | 1.01     |
| Mmp2      | 17390     | Both       | 914                  | 1.76E-03      | 2     | 1.15        | -1.60    | -1.48    | -1.23    | -1.32    |
| Lamb2     | 16779     | Both       | 210                  | 1.76E-03      | 8     | -1.44       | 1.19     | 1.58     | -1.03    | -1.12    |
| Angpt2    | 11601     | Both       | 189                  | 1.93E-03      | 10    | 2.03        | 1.19     | 1.05     | 1.59     | 1.33     |
| Mfap4     | 76293     | Limma      | 0                    | 3.96E-03      | 3     | -3.12       | 1.00     | -1.69    | 1.00     | 1.00     |
| Bgn       | 12111     | Timecourse | 653                  | 4.13E-03      | 1     | 2.23        | -1.90    | -1.28    | -1.13    | -1.08    |
| Thsd4     | 207596    | Limma      | 0                    | 4.79E-03      | 2     | 1.17        | 1.00     | -1.58    | 1.00     | 1.00     |
| Serpina5  | 268591    | Both       | 392                  | 4.93E-03      | 10    | 3.52        | 1.44     | 1.20     | 1.78     | -1.21    |
| Angptl1   | 72713     | Limma      | 0                    | 4.96E-03      | 5     | -1.82       | 1.00     | 1.00     | 1.73     | 1.00     |
| Nppc      | 18159     | Limma      | 0                    | 5.24E-03      | 10    | 1.16        | 1.46     | 1.41     | 1.00     | 1.00     |
| Lcn2      | 16819     | Limma      | 0                    | 5.53E-03      | 10    | 1.15        | 1.79     | 1.00     | 1.43     | 1.00     |
| Vegfa     | 22339     | Both       | 463                  | 7.37E-03      | 8     | -2.20       | 1.03     | 1.58     | 1.21     | 1.06     |
| Spink2    | 69982     | Limma      | 0                    | 7.85E-03      | 8     | -2.28       | 1.00     | 2.11     | 1.00     | 1.00     |
| Sema3f    | 20350     | Limma      | 0                    | 9.15E-03      | 8     | -1.17       | 1.00     | 1.41     | 1.28     | 1.00     |
| Tor2a     | 30933     | Limma      | 0                    | 1.32E-02      | 7     | 1.01        | 1.00     | 1.31     | -1.48    | 1.00     |
| Igfbp4    | 16010     | Both       | 365                  | 1.57E-02      | 1     | 1.44        | -1.65    | -1.14    | -1.40    | 1.09     |
| Tgfb3     | 21814     | Timecourse | 218                  | 1.62E-02      | 10    | 1.34        | 1.25     | 1.22     | 1.03     | 1.18     |
| Lypd6     | 320343    | Both       | 483                  | 1.63E-02      | 10    | 1.31        | 2.08     | 1.29     | 1.32     | 1.15     |
| Saa3      | 20210     | Limma      | 0                    | 1.88E-02      | 4     | 13.85       | -3.36    | 1.00     | 1.00     | 1.00     |
| Inhba     | 16323     | Timecourse | 194                  | 1.92E-02      | 9     | 12.95       | 1.60     | 1.09     | 1.15     | 1.10     |
| Esm1      | 71690     | Limma      | 0                    | 1.96E-02      | 5     | -1.35       | -2.00    | 1.00     | 1.00     | 1.00     |

Supplemental Table 2. Differentially expressed genes encoding secreted proteins during *in vitro* follicle development

| Symbol  | Entrez ID | Method     | Timecourse Hotelling | Limma p-value | Group | Fold Change |          |          |          |          |
|---------|-----------|------------|----------------------|---------------|-------|-------------|----------|----------|----------|----------|
|         |           |            |                      |               |       | D2 vs D0    | D4 vs D2 | D5 vs D4 | D6 vs D5 | D8 vs D6 |
| Vcan    | 13003     | Timecourse | 232                  | 2.05E-02      | 10    | 1.02        | 1.10     | 1.89     | 1.07     | -1.20    |
| Sfrp1   | 20377     | Timecourse | 429                  | 2.17E-02      | 1     | 1.55        | -1.18    | -1.23    | -1.57    | -1.15    |
| Col6a1  | 107581    | Both       | 218                  | 1.38E-01      | 1     | 1.42        | -1.47    | -1.24    | 1.03     | 1.03     |
| Gdnf    | 14573     | Timecourse | 202                  | 5.55E-02      | 6     | 1.49        | 1.23     | 1.50     | -1.12    | -1.26    |
| Sct     | 20287     | Timecourse | 201                  | 8.03E-02      | 8     | -1.73       | 1.30     | 1.64     | -1.19    | -1.18    |
| Gpx3    | 14778     | Timecourse | 328                  | 9.89E-02      | 10    | -1.48       | 2.83     | -1.48    | 1.65     | 1.44     |
| Prss35  | 244954    | Timecourse | 218                  | 1.09E-01      | 7     | 1.11        | 1.02     | 1.38     | 1.01     | 1.17     |
| Col6a1  | 12833     | Both       | 218                  | 1.38E-01      | 1     | 1.42        | -1.47    | -1.24    | 1.03     | 1.03     |
| Defb19  | 246700    | Timecourse | 185                  | 2.14E-01      | 10    | 1.53        | 1.28     | 1.32     | 1.06     | 1.05     |
| Loxl1   | 16949     | Timecourse | 305                  | 2.93E-01      | 4     | 3.01        | -1.10    | -1.57    | 1.34     | -1.51    |
| Rarres2 | 71660     | Timecourse | 213                  | 4.13E-01      | 8     | -1.76       | 1.05     | 1.14     | 1.26     | 1.21     |
| Lum     | 17022     | Timecourse | 255                  | 4.14E-01      | 4     | 1.23        | 1.17     | -1.56    | -1.23    | 1.07     |
