# Supplementary material
Source: PubMed Central journal article supplement (PMC3730266)

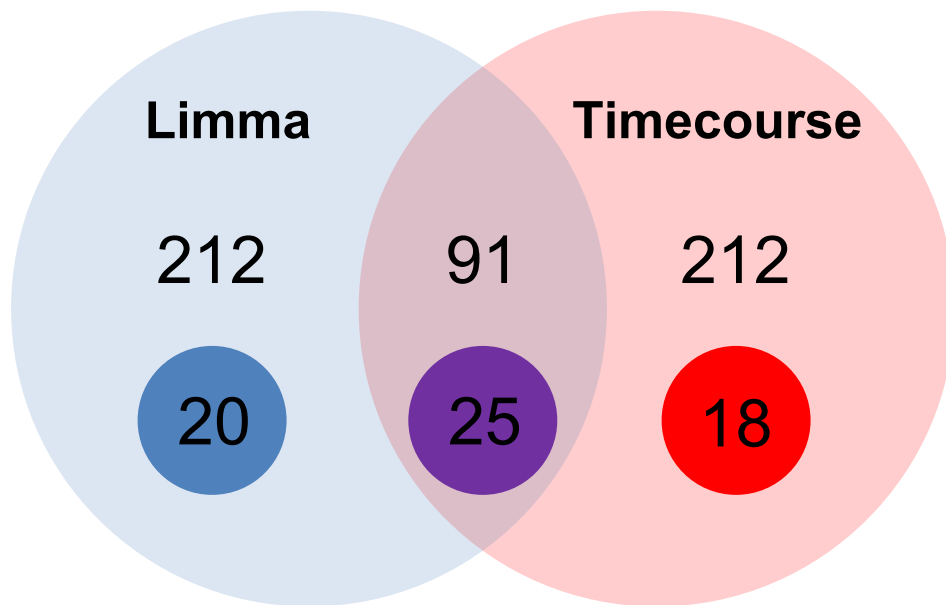

Supplement: NIHMS472280-supplement-Supplemental_Figure_1.pdf [file NIHMS472280-supplement-Supplemental_Figure_1.pdf]

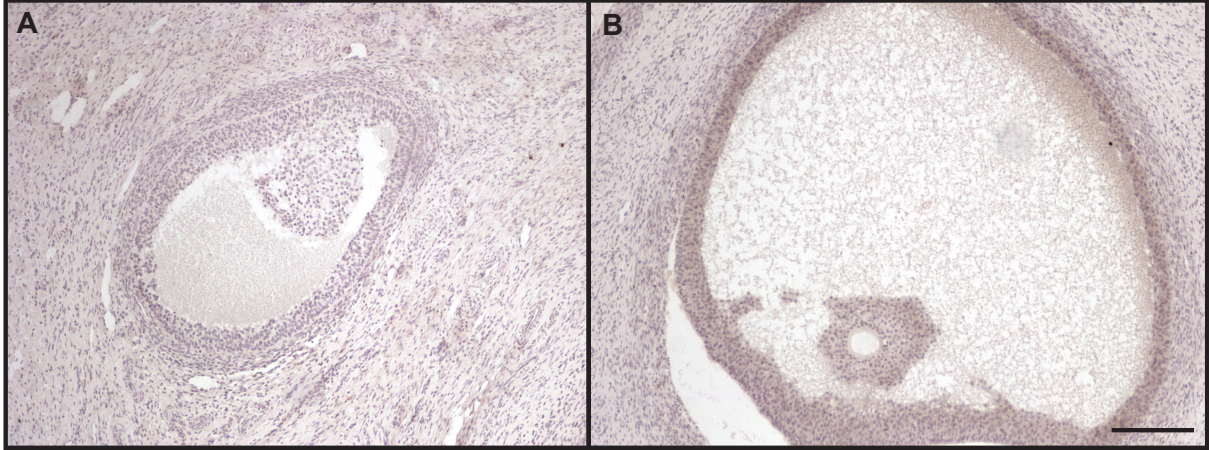

Supplement: NIHMS472280-supplement-Supplemental_Figure_2.pdf [file NIHMS472280-supplement-Supplemental_Figure_2.pdf]
